# Supplementary material for: Enhanced photocurrent in heterostructures formed between CH3NH3PbI3perovskite films and graphdiyne
Source: Royal Society of Chemistry journal article supplement (doi:10.1039/d0cp00170h), 2020-01-01
Supplement: d0cp00170h1.pdf [file d0cp00170h1.pdf]

## Supplementary Information

### **Enhanced Photocurrent in Heterostructures Formed between CH<sub>3</sub>NH<sub>3</sub>PbI<sub>3</sub> Perovskite Films and Graphdiyne†**

Fuzhen Bi,<sup>ab</sup> ChiYung Yam,<sup>c</sup> Chengjie Zhao,<sup>a</sup> Le Liu,<sup>a</sup> Min Zhao,<sup>a</sup> Xiao Zheng<sup>d</sup> and  
Tonggang Jiu<sup>\*abe</sup>

<sup>a</sup>Qingdao Institute of Bioenergy and Bioprocess Technology, Chinese Academy of Sciences, Qingdao 266101, China

<sup>b</sup>Center of Materials Science and Optoelectronics Engineering, University of Chinese Academy of Sciences, Beijing 100049, China

<sup>c</sup>Beijing Computational Science Research Center, Beijing 100193, China

<sup>d</sup>Hefei National Laboratory for Physical Sciences at the Microscale and Department of Chemical Physics, University of Science and Technology of China, Hefei, 230026, China

<sup>e</sup>Department of Chemistry and Key Laboratory for Preparation and Application of Ordered Structural Materials of Guangdong Province, Shantou University, Shantou, 515063, China

\*Corresponding Author.

E-mail: [jiutg@qibebt.ac.cn](mailto:jiutg@qibebt.ac.cn)

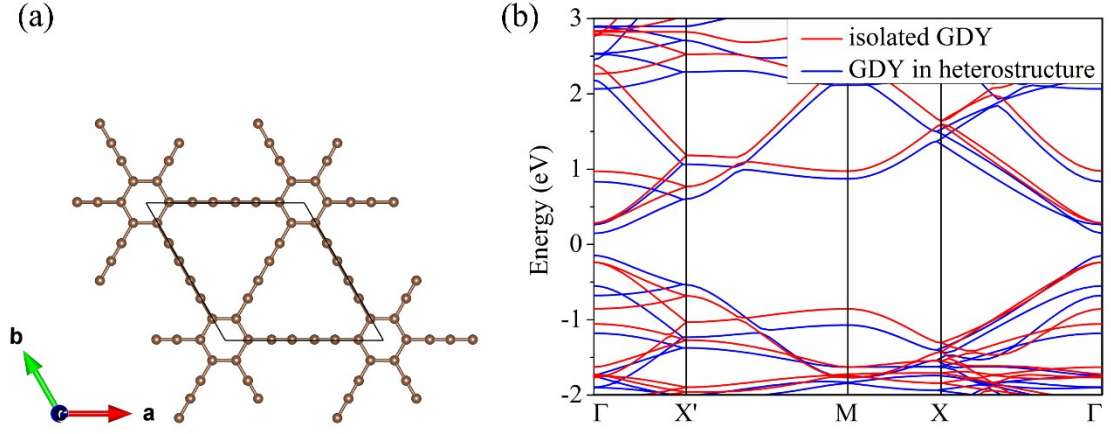

**Fig. S1** (a) Optimized stable primitive cell structure of GDY; (b) Band structures of isolated GDY and GDY in heterostructure correspond to the  $1 \times \sqrt{3}$  GDY supercell constructed by  $\vec{a} + \vec{b}$  and  $\vec{a} - \vec{b}$  of the primitive cell.

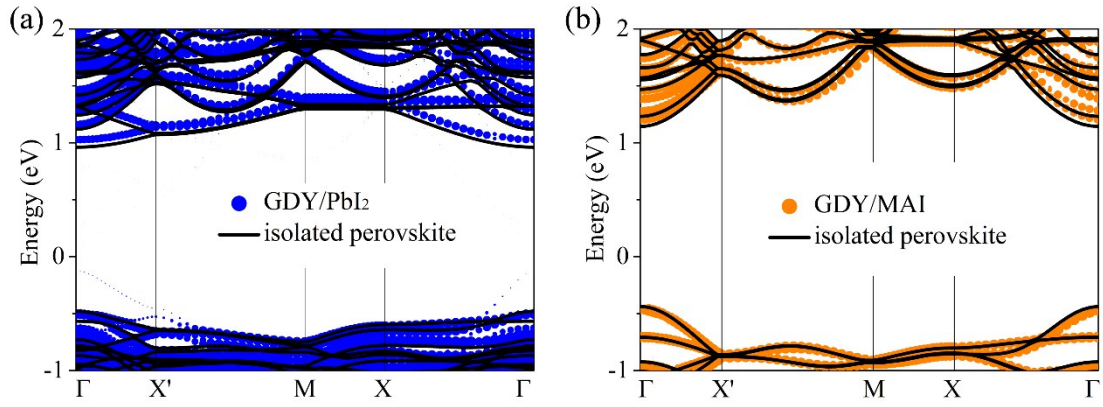

**Fig. S2** Projected band structure of perovskite slab in the GDY/PbI<sub>2</sub> (a) and the GDY/MAI (b) heterostructures compared to isolated perovskite slab. The size of the symbol indicates the contribution weight.

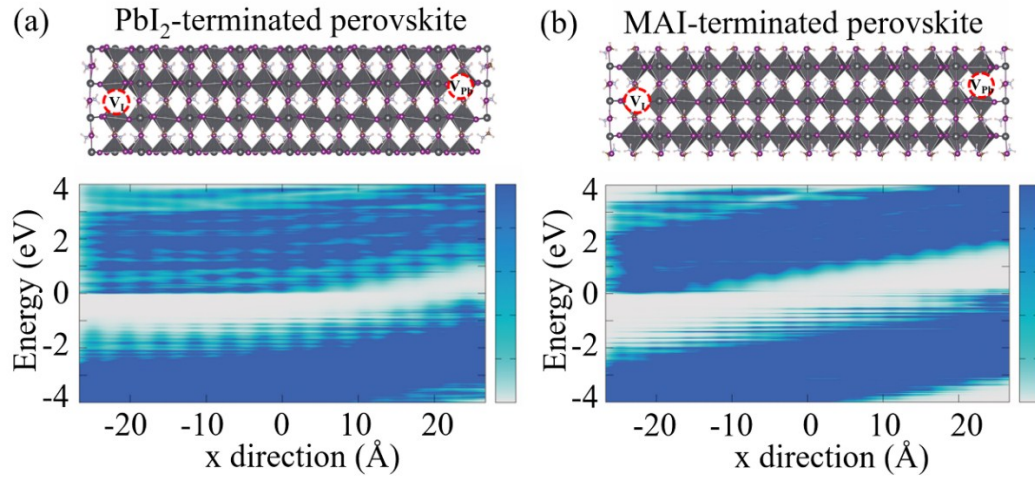

**Fig. S3** (a) The structure of p-n heterojunction (top panel) and the LDOS in transport direction (bottom panel) of PbI<sub>2</sub>-terminated surface; (b) The structure of p-n heterojunction (top panel) and the LDOS in transport direction (bottom panel) of MAI-terminated surface.

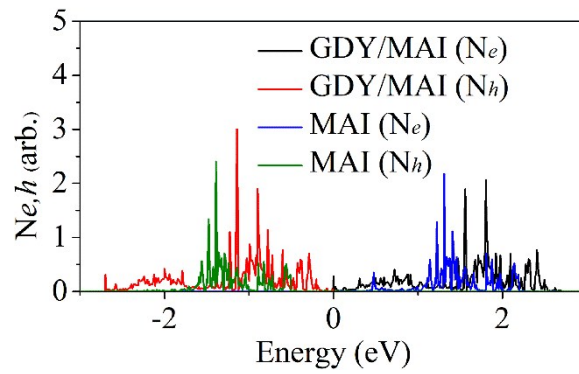

**Fig. S4** The number of photogenerated electrons and holes on the energy level E in the MAI-terminated system.
